# Supplementary material
Source: publisher figshare collection journal article supplement (https://gsajournals.figshare.com/articles/dataset/_/16682680)
Supplement: Supplementary file 3 [file 1]

## Supplementary Figures

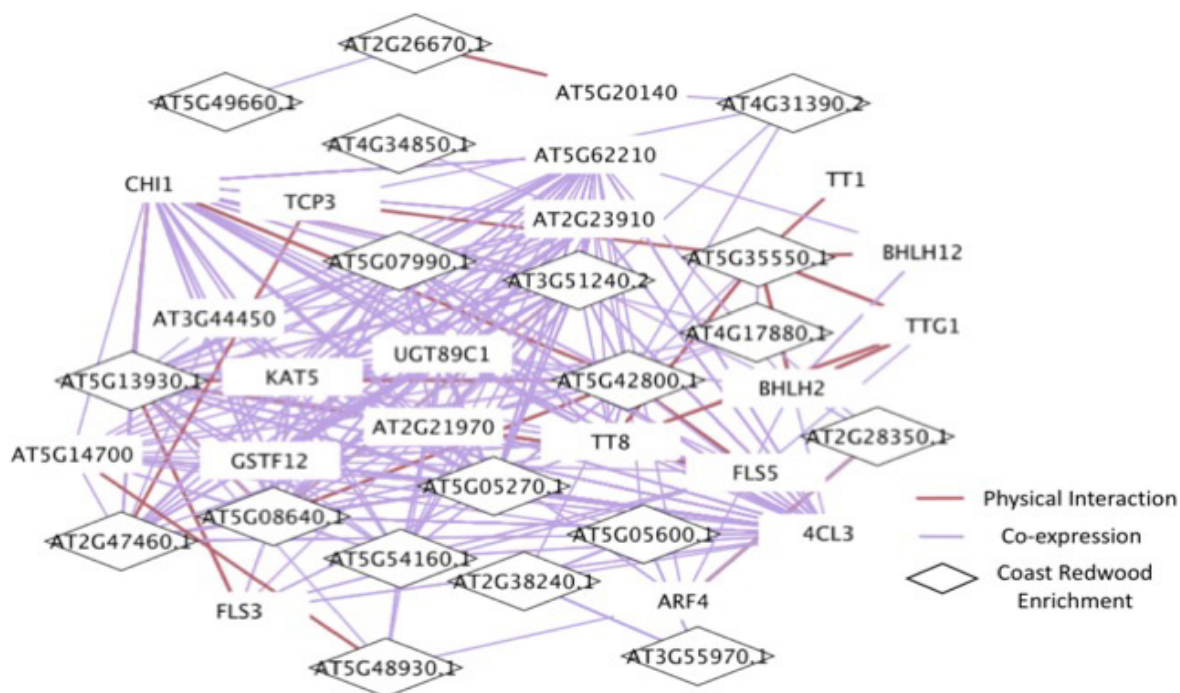

**Figure S1:** Genes found to be enriched near Copia retroelements are primarily associated with the phenylpropanoid and flavonoid biosynthesis pathways. Genes discovered in coast redwood are shown in a diamond. The red lines between gene nodes represent physical interactions while purple lines link co-expressed genes.

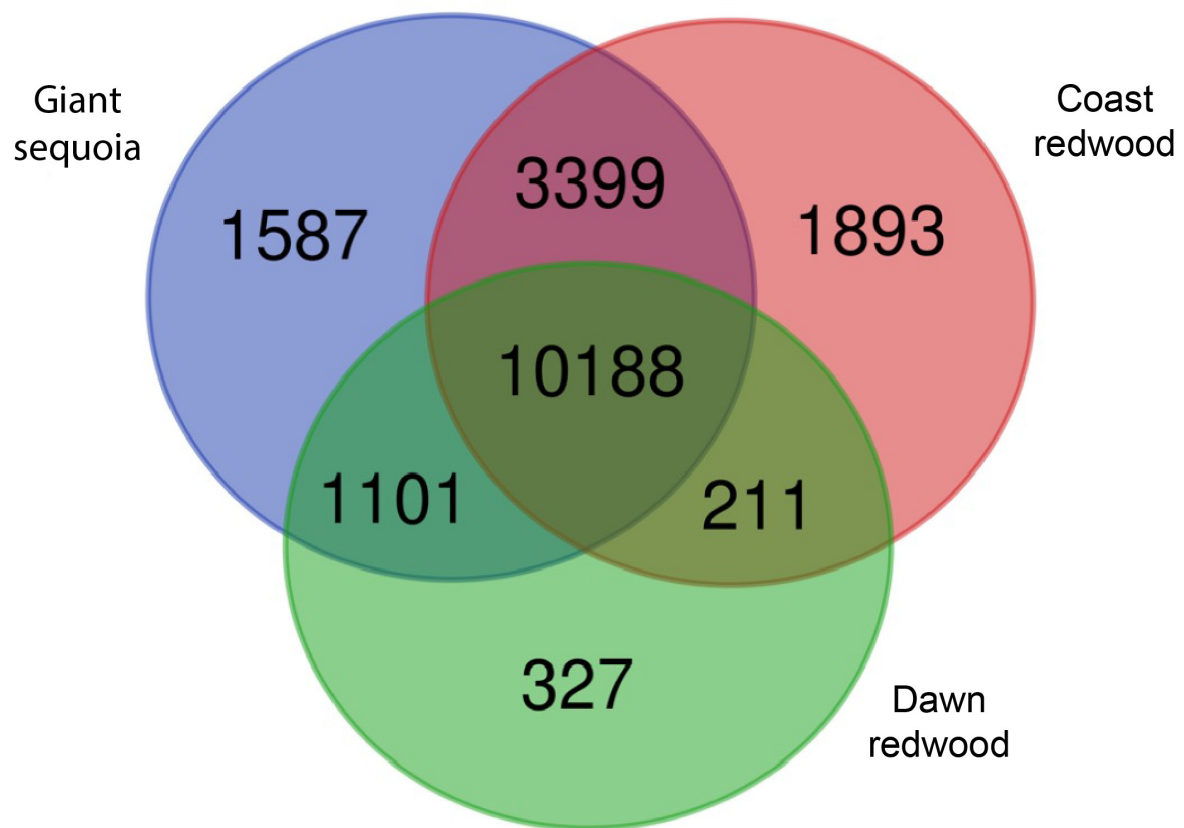

**Figure S2:** Gene family analysis depicting the shared and unique gene families among giant sequoia, coast redwood, and dawn redwood.

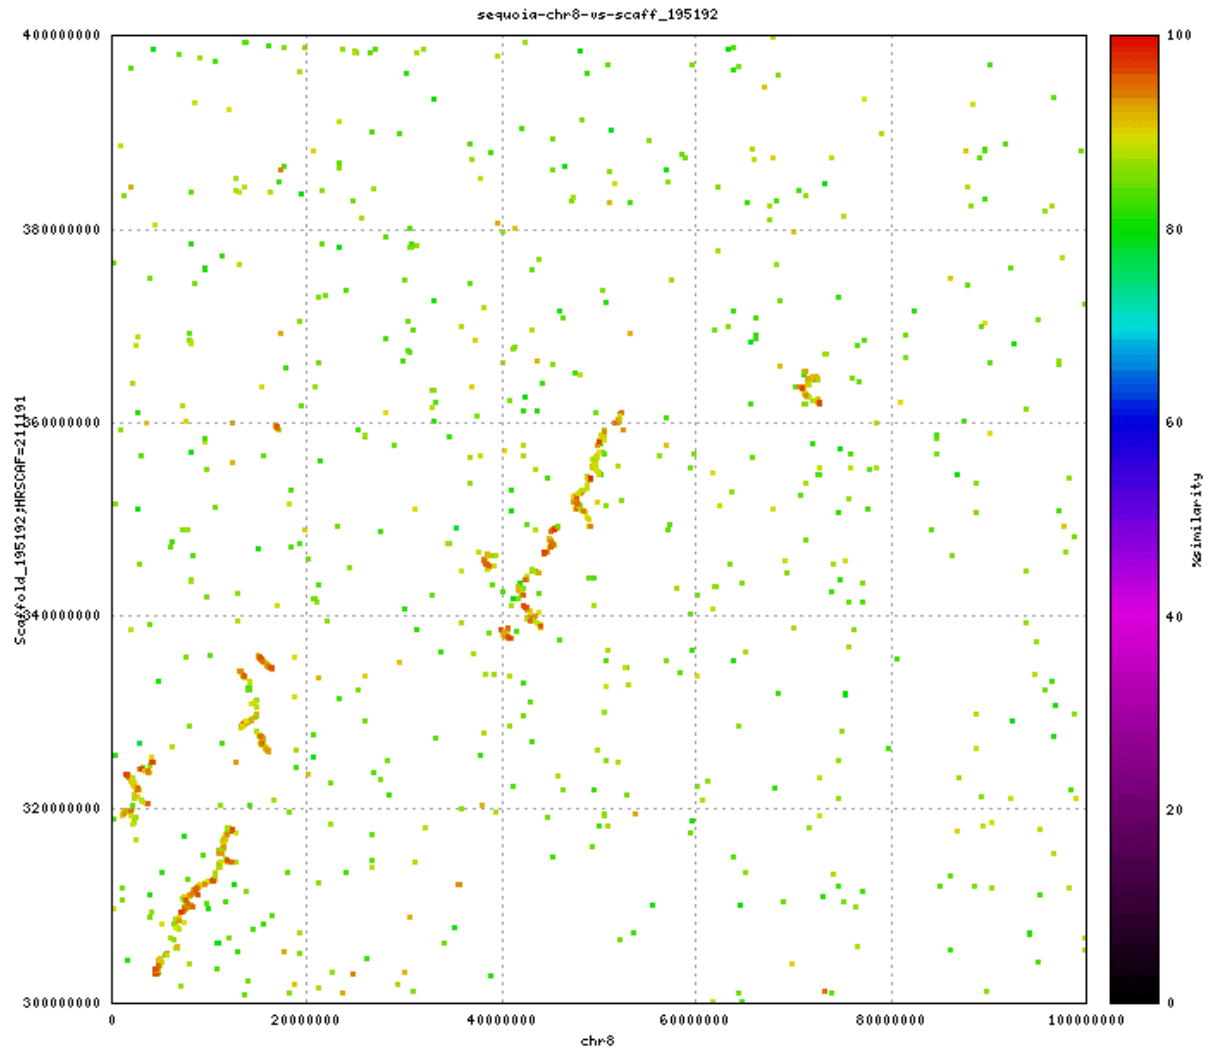

**Figure S3:** Alignment of coast redwood Scaffold\_195192 against giant sequoia chromosome 8 showing a large-scale region (approximately 70 Mb) of synteny. (The total length of each of giant sequoia chromosome 8 and the coast redwood scaffold is >500 Mb.)
