# Supplementary material
Source: publisher figshare collection journal article supplement (https://gsajournals.figshare.com/articles/dataset/_/16682680)
Supplement: Supplementary file 4 [file 1]

## Supplementary Table S1

**Table S1. 33 coast redwood scaffolds that contain centromeric repeats.** The first 21 scaffolds are longer than 1Mbp. Four of them contain telomeric repeats on one end and thus may represent nearly complete chromosome arms. The sizes shown in column 2 exclude gaps, which are represented by Ns in the scaffolds; therefore, the centromere positions may be larger than the non-gapped sizes.

| Scaffold ID       | Size (bp)     | Centromere start | Centromere end | Contains telomeric repeats at one end |
|-------------------|---------------|------------------|----------------|---------------------------------------|
| Scaffold_167773   | 452,197,195   | 357,540,513      | 359,435,278    | No                                    |
| Scaffold_181730_1 | 18,758,433    | 18,530,381       | 18,844,362     | No                                    |
| Scaffold_181730_2 | 251,136,108   | 164,575,943      | 166,238,692    | No                                    |
| Scaffold_203021_1 | 770,211,427   | 760,191,227      | 761,547,604    | Yes                                   |
| Scaffold_203021_4 | 2,007,259     | 1,919,073        | 2,011,822      | No                                    |
| Scaffold_203021_5 | 244,097,060   | 244,818,420      | 245,075,522    | No                                    |
| Scaffold_203021_6 | 374,257,369   | 1,171,110        | 1,358,435      | No                                    |
| Scaffold_332052_1 | 50,632,319    | 50,549,445       | 50,800,464     | No                                    |
| Scaffold_332052_2 | 34,932,801    | 28,701,053       | 30,383,849     | Yes                                   |
| Scaffold_332052_3 | 8,034,483     | 8,041,132        | 8,044,893      | No                                    |
| Scaffold_332052_4 | 15,549,043    | 1,173,040        | 2,526,183      | No                                    |
| Scaffold_343581   | 818,281,871   | 157,045,044      | 158,734,548    | No                                    |
| Scaffold_344217   | 1,279,033,992 | 538,568,497      | 540,277,024    | No                                    |
| Scaffold_353338   | 1,078,900,225 | 162,232,389      | 163,560,123    | No                                    |
| Scaffold_387868_1 | 294,319,338   | 295,090,143      | 295,438,622    | No                                    |
| Scaffold_387868_2 | 1,017,252     | 998,708          | 1,018,320      | No                                    |
| Scaffold_387868_3 | 609,863,577   | 611,404,350      | 612,246,774    | No                                    |
| Scaffold_387868_4 | 15,510,204    | 8,352,936        | 9,869,644      | No                                    |
| Scaffold_6215_1   | 563,586,863   | 565,166,008      | 565,784,321    | Yes                                   |
| Scaffold_6215_3   | 22,931,044    | 2,094,101        | 2,211,438      | Yes                                   |
| Scaffold_6215_4   | 79,312,185    | 3,373,007        | 6,646,160      | No                                    |
| Scaffold_1310     | 254,797       | 6,292            | 254,797        | No                                    |
| Scaffold_14063    | 128,602       | 10,262           | 120,578        | No                                    |
| Scaffold_203021_2 | 818,366       | 710,743          | 825,926        | No                                    |
| Scaffold_203021_3 | 879,599       | 449,787          | 879,719        | No                                    |

Table S1 (cont.)

| <b>Scaffold ID</b> | <b>Size (bp)</b> | <b>Centromere<br/>start</b> | <b>Centromere<br/>end</b> | <b>Contains telomeric<br/>repeats at one end</b> |
|--------------------|------------------|-----------------------------|---------------------------|--------------------------------------------------|
| Scaffold_28466     | 151,992          | 473                         | 150,244                   | No                                               |
| Scaffold_327523    | 230,184          | 47,988                      | 229,477                   | No                                               |
| Scaffold_332344    | 208,351          | 685                         | 208,417                   | No                                               |
| Scaffold_33838     | 149,918          | 604                         | 145,167                   | No                                               |
| Scaffold_346330    | 206,316          | 1,149                       | 201,944                   | No                                               |
| Scaffold_393371    | 225,015          | 14,674                      | 231,893                   | No                                               |
| Scaffold_5955      | 158,393          | 3,681                       | 141,669                   | No                                               |
| Scaffold_6215_2    | 127,906          | 58,643                      | 127,906                   | No                                               |
